# Supplementary material for: Synthesis and structural investigation of N-acyl selenophosphoramides
Source: Royal Society of Chemistry journal article supplement (doi:10.1039/b907641g), 2009-01-01

# Synthesis and structural investigation of *N*-acyl selenophosphoramides

Grzegorz Cholewinski,<sup>a</sup> Jaroslaw Chojnacki,<sup>b</sup> Jerzy Pikies,<sup>b</sup> Janusz Rachon<sup>a\*</sup>

<sup>a</sup> Gdansk University of Technology, Chemical Faculty, Department of Organic Chemistry,  
G. Narutowicza 11/12, 80-233 Gdansk

<sup>b</sup> Gdansk University of Technology, Chemical Faculty, Department of Inorganic Chemistry,  
G. Narutowicza 11/12, 80-233 Gdansk

## Electronic Supporting Information

| <b>X-ray data for:</b>                                                                                | <b>Page</b> |
|-------------------------------------------------------------------------------------------------------|-------------|
| <i>O</i> -( <i>p</i> -chlorobenzoyl)-2-oxo-2-seleno-5,5-dimethyl-1,3,2-dioxaphosphorinane <b>6c</b>   | 2           |
| <i>O</i> -( <i>p</i> -metoxybenzoyl)-2-oxo-2-seleno-5,5-dimethyl-1,3,2-dioxaphosphorinane <b>6d</b>   | 2           |
| <i>O</i> -( <i>p</i> -nitrobenzoyl)-2-oxo-2-seleno-5,5-dimethyl-1,3,2-dioxaphosphorinane <b>6e</b>    | 2           |
| <i>N</i> -( <i>p</i> -chlorobenzoyl)-2-amino-2-seleno-5,5-dimethyl-1,3,2-dioxaphosphorinane <b>8a</b> | 2           |
| <i>N</i> -pivaloyl-2-amino-2-seleno-5,5-dimethyl-1,3,2-dioxaphosphorinane <b>8b</b>                   | 2           |
| 2-amino-2-seleno-5,5-dimethyl-1,3,2-dioxaphosphorinane <b>11a</b>                                     | 2           |

## Figures - the ORTEP views for:

|                                                                                                       |   |
|-------------------------------------------------------------------------------------------------------|---|
| <i>O</i> -( <i>p</i> -metoxybenzoyl)-2-oxo-2-seleno-5,5-dimethyl-1,3,2-dioxaphosphorinane <b>6d</b>   | 3 |
| <i>O</i> -( <i>p</i> -nitrobenzoyl)-2-oxo-2-seleno-5,5-dimethyl-1,3,2-dioxaphosphorinane <b>6e</b>    | 3 |
| <i>N</i> -( <i>p</i> -chlorobenzoyl)-2-amino-2-seleno-5,5-dimethyl-1,3,2-dioxaphosphorinane <b>8a</b> | 4 |

## <sup>31</sup>P NMR, <sup>1</sup>H NMR, <sup>13</sup>C NMR spectra:

|                                                                                                                              |       |
|------------------------------------------------------------------------------------------------------------------------------|-------|
| 2-amino-2-seleno-5,5-dimethyl-1,3,2-dioxaphosphorinane <b>11a</b> / acetone-d <sub>6</sub>                                   | 5-7   |
| 2-metyloamino-2-seleno-5,5-dimethyl-1,3,2-dioxaphosphorinane <b>11c</b> / CDCl <sub>3</sub>                                  | 8-10  |
| <i>N</i> -( <i>p</i> -chlorobenzoyl)-2-amino-2-seleno-5,5-dimethyl-1,3,2-dioxaphosphorinane <b>8a</b><br>/ CDCl <sub>3</sub> | 11-13 |
| <i>N</i> -pivaloyl-2-amino-2-seleno-5,5-dimethyl-1,3,2-dioxaphosphorinane <b>8b</b> / CDCl <sub>3</sub>                      | 14-16 |

**ESI. Table 1.** Summary of x-ray structural analyses for **6c**, **6d**, **6e**, **8a**, **8b** and **11a**; units: Å, °.

|                                      | <b>6c</b>                                            | <b>6d</b>                                          | <b>6e</b>                                           | <b>8a</b>                                             | <b>8b</b>                                           | <b>11a</b>                                         |
|--------------------------------------|------------------------------------------------------|----------------------------------------------------|-----------------------------------------------------|-------------------------------------------------------|-----------------------------------------------------|----------------------------------------------------|
| Formula                              | C <sub>12</sub> H <sub>14</sub> ClO <sub>4</sub> PSe | C <sub>13</sub> H <sub>17</sub> O <sub>5</sub> PSe | C <sub>12</sub> H <sub>14</sub> NO <sub>6</sub> PSe | C <sub>12</sub> H <sub>15</sub> ClNO <sub>3</sub> PSe | C <sub>10</sub> H <sub>20</sub> NO <sub>3</sub> PSe | C <sub>5</sub> H <sub>12</sub> NO <sub>2</sub> PSe |
| <i>M</i> , g/mol                     | 367.61                                               | 363.2                                              | 378.17                                              | 366.63                                                | 312.2                                               | 228.09                                             |
| Crystal system                       | Monoclinic                                           | Monoclinic                                         | Monoclinic                                          | Monoclinic                                            | Monoclinic                                          | Monoclinic                                         |
| <i>a</i>                             | 10.9640(2)                                           | 8.6686(3)                                          | 16.4014(10)                                         | 11.9308(7)                                            | 9.9981(2)                                           | 7.7108(2)                                          |
| <i>b</i>                             | 15.2200(3)                                           | 14.9809(4)                                         | 7.6161(3)                                           | 15.4868(9)                                            | 27.8966(5)                                          | 10.9466(3)                                         |
| <i>c</i>                             | 8.8822(2)                                            | 12.4583(4)                                         | 12.2729(6)                                          | 8.2832(4)                                             | 10.6258(3)                                          | 10.9955(3)                                         |
| <i>α</i>                             | 90                                                   | 90                                                 | 90                                                  | 90                                                    | 90                                                  | 90                                                 |
| <i>β</i>                             | 91.581(2)                                            | 107.683(4)                                         | 103.358(6)                                          | 91.617(5)                                             | 109.816(3)                                          | 103.130(3)                                         |
| <i>γ</i>                             | 90                                                   | 90                                                 | 90                                                  | 90                                                    | 90                                                  | 90                                                 |
| <i>V</i> /Å <sup>3</sup>             | 1481.63(5)                                           | 1541.44(9)                                         | 1491.59(13)                                         | 1529.88(15)                                           | 2788.18(11)                                         | 903.83(4)                                          |
| Space group                          | <i>P</i> 2 <sub>1</sub> / <i>c</i> (14)              | <i>P</i> 2 <sub>1</sub> / <i>c</i> (14)            | <i>P</i> 2 <sub>1</sub> / <i>c</i> (14)             | <i>P</i> 2 <sub>1</sub> / <i>c</i> (14)               | <i>P</i> 2 <sub>1</sub> / <i>c</i> (14)             | <i>P</i> 2 <sub>1</sub> / <i>n</i> (14)            |
| <i>Z</i>                             | 4                                                    | 4                                                  | 4                                                   | 4                                                     | 8                                                   | 4                                                  |
| Refls:<br>meas./unique               | 12763/3578                                           | 13199/3718                                         | 11320/3245                                          | 13245/3689                                            | 20709/6084                                          | 5956/1679                                          |
| <i>R</i> indices (for<br>obs. refls) |                                                      |                                                    |                                                     |                                                       |                                                     |                                                    |
| <i>R</i> <sub>1</sub>                | 0.0289                                               | 0.0414                                             | 0.0533                                              | 0.0431                                                | 0.0363                                              | 0.0256                                             |
| <i>wR</i> <sub>2</sub>               | 0.0751                                               | 0.0883                                             | 0.1438                                              | 0.0958                                                | 0.0948                                              | 0.0648                                             |
| <i>T</i> , K                         | 120                                                  | 298                                                | 120                                                 | 295                                                   | 120                                                 | 120                                                |
| <i>μ</i> , mm <sup>-1</sup>          | 2.828                                                | 2.554                                              | 2.65                                                | 2.736                                                 | 2.802                                               | 4.279                                              |
| <i>θ</i> range, °                    | 2.29-28.0                                            | 2.19-28.0                                          | 2.55-27.0                                           | 2.16-28.0                                             | 2.28-27.0                                           | 2.66-25.5                                          |

## Figures

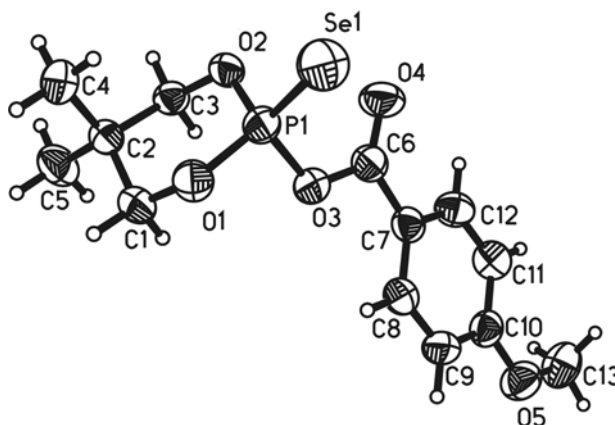

**ESI. Figure 1.** The molecular structure of *O*-(*p*-methoxybenzoyl)-2-oxo-2-seleno-5,5-dimethyl-1,3,2-dioxaphosphorinane **6d**. Displacement ellipsoids 50%, C-H hydrogen atoms not labelled. Selected bond lengths (Å) and angles (°): O1-P1 1.5671(19), O2-P1 1.5608(18), C6-C7 1.469(4), O1-P1-O3 99.42(10), O2-P1-O3 106.11(10), P1-O3-C6 122.26(16), Se1-P1-O3-C6 –65.69(19)

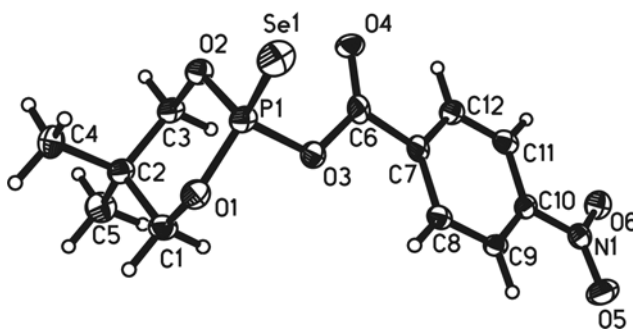

**ESI. Figure 2.** The molecular structure of *O*-(*p*-nitrobenzoyl)-2-oxo-2-seleno-5,5-dimethyl-1,3,2-dioxaphosphorinane **6e**. Displacement ellipsoids 50%, C-H hydrogen atoms not labelled. Selected bond lengths (Å) and angles (°): O1-P1 1.561(3), O2-P1 1.566(3), C6-C7 1.500(6), O1-P1-O3 98.92(15), O2-P1-O3 104.88(15), P1-O3-C6 119.8(3), Se1-P1-O3-C6 –69.2(3)

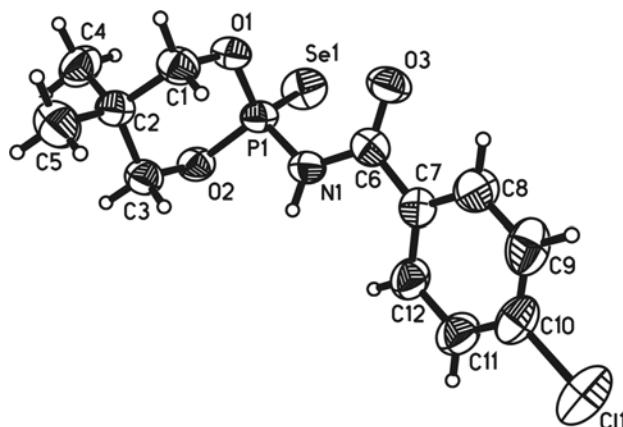

**ESI. Figure 3.** The molecular structure of *N*-(*p*-chlorobenzoyl)-2-amino-2-seleno-5,5-dimethyl-1,3,2-dioxaphosphorinane **8a**. Displacement ellipsoids 50%, hydrogen atoms not labelled. Selected bond lengths (Å) and angles (°): O1-P1 1.567(2), O2-P1 1.587(2), C6-C7 1.500(5), O1-P1-N1 106.92(14), O2-P1-N1 100.60(14), P1-N1-C6 125.1(3), P1-N1-H1 116(3), C6-N1-H1 116(3), Se1-P1-N1-C6 63.4(3).

2-amino-2-seleno-5,5-dimethyl-1,3,2-dioxaphosphorinane **11a**

$^{31}\text{P}$  NMR (acetone- $\text{d}_6$ ):

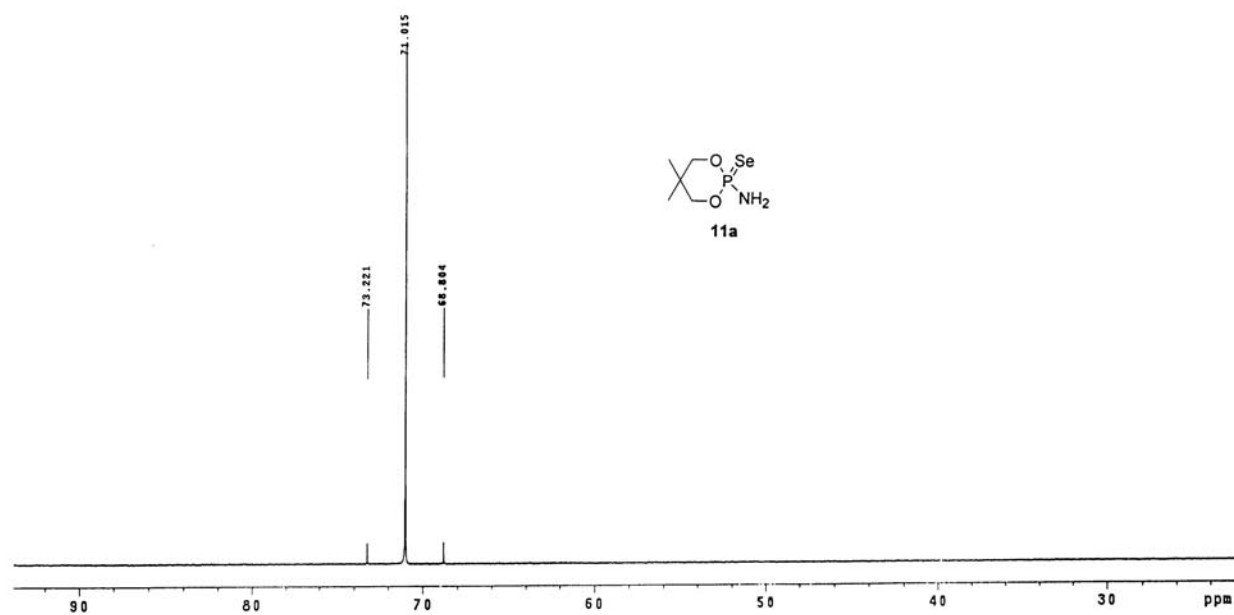

$^1\text{H}$  NMR (acetone- $\text{d}_6$ ):

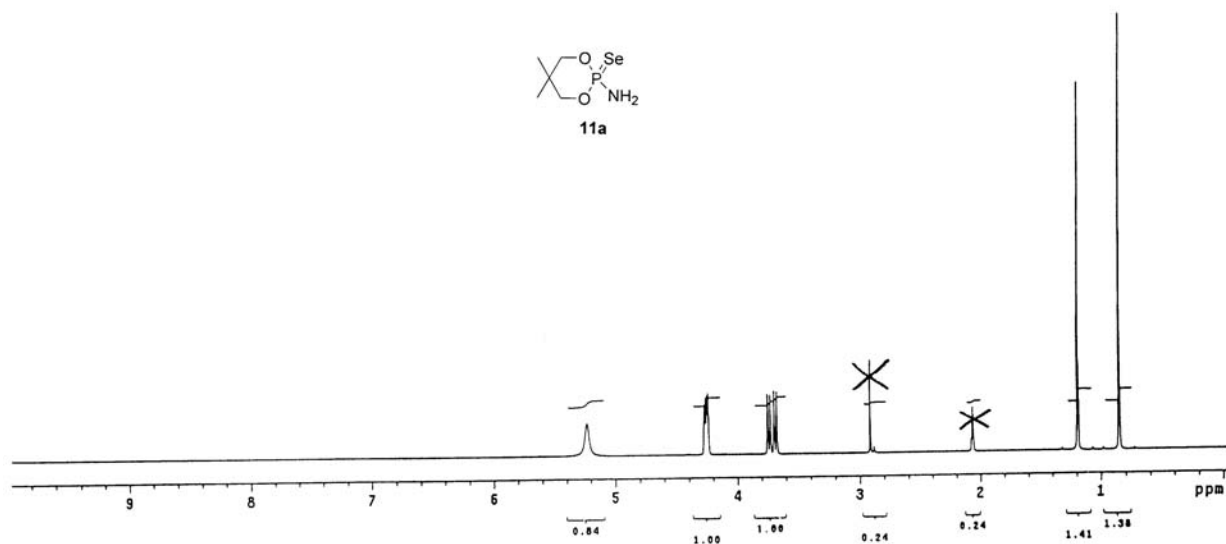

$^1\text{H}$  NMR (acetone- $\text{d}_6$ ):

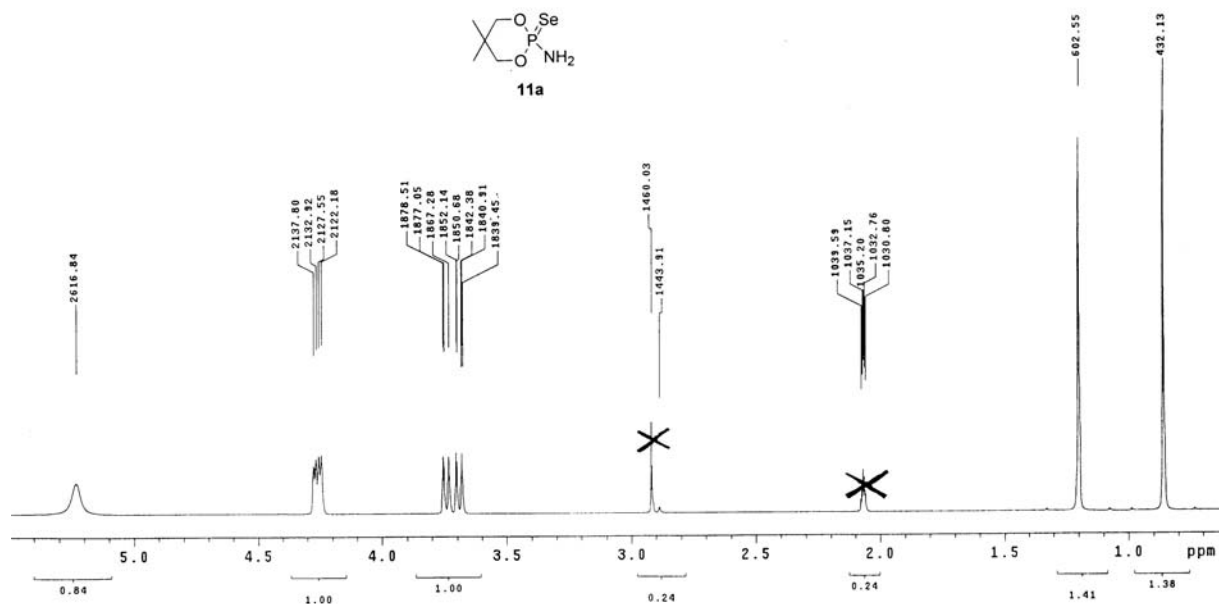

$^{13}\text{C}$  NMR (acetone- $\text{d}_6$ ):

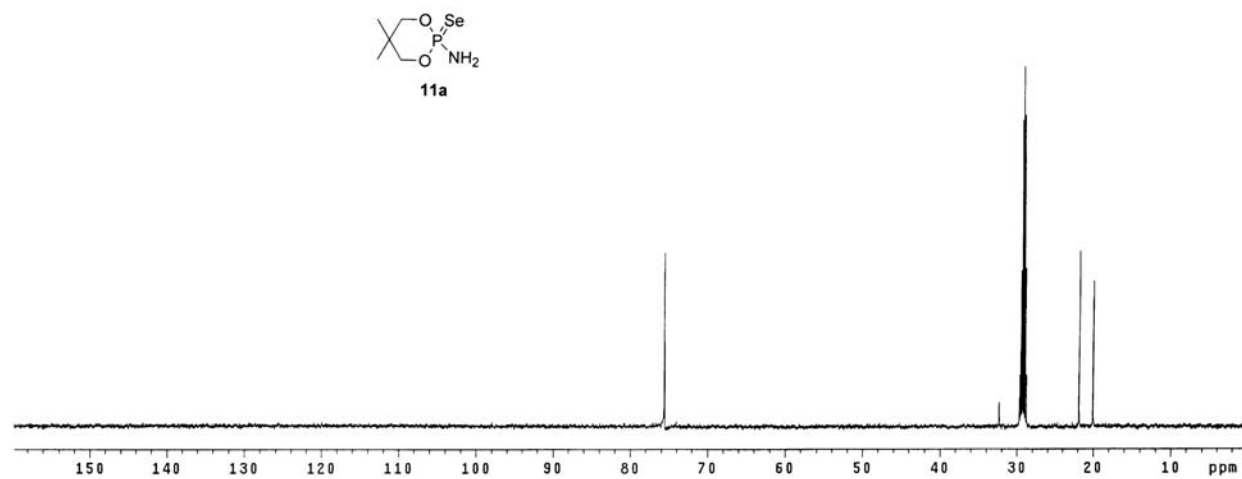

$^{13}\text{C}$  NMR (acetone- $d_6$ ):

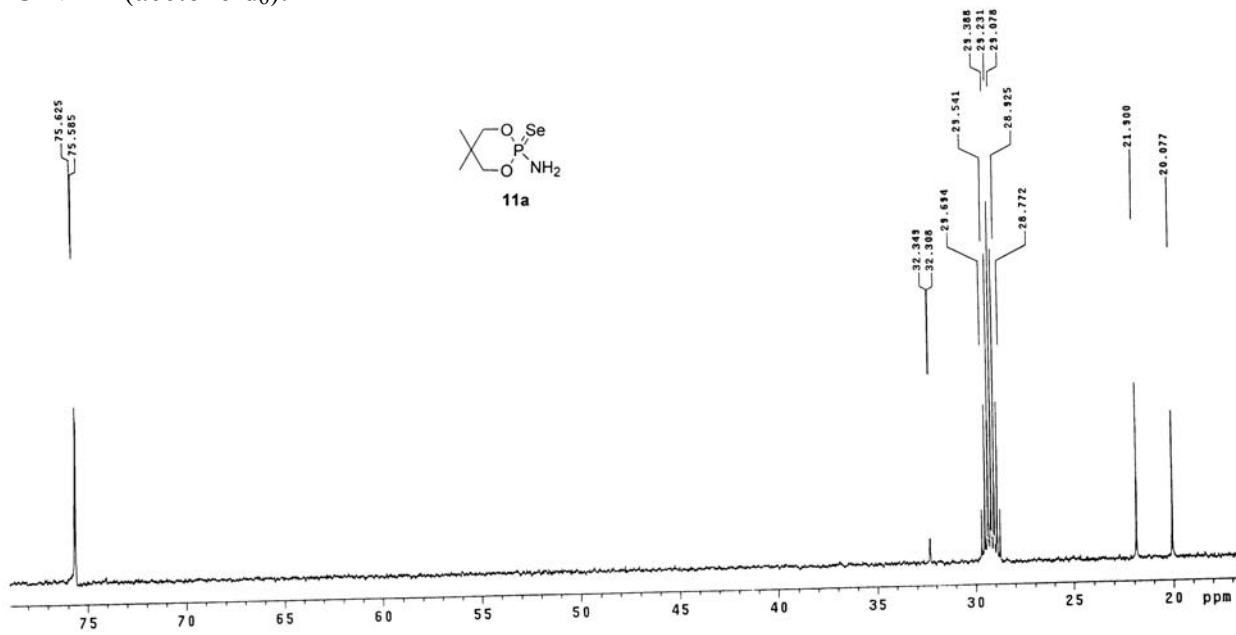

2-metyloamino-2-seleno-5,5-dimethyl-1,3,2-dioxaphosphorinane **11c**

$^{31}\text{P}$  NMR ( $\text{CDCl}_3$ ):

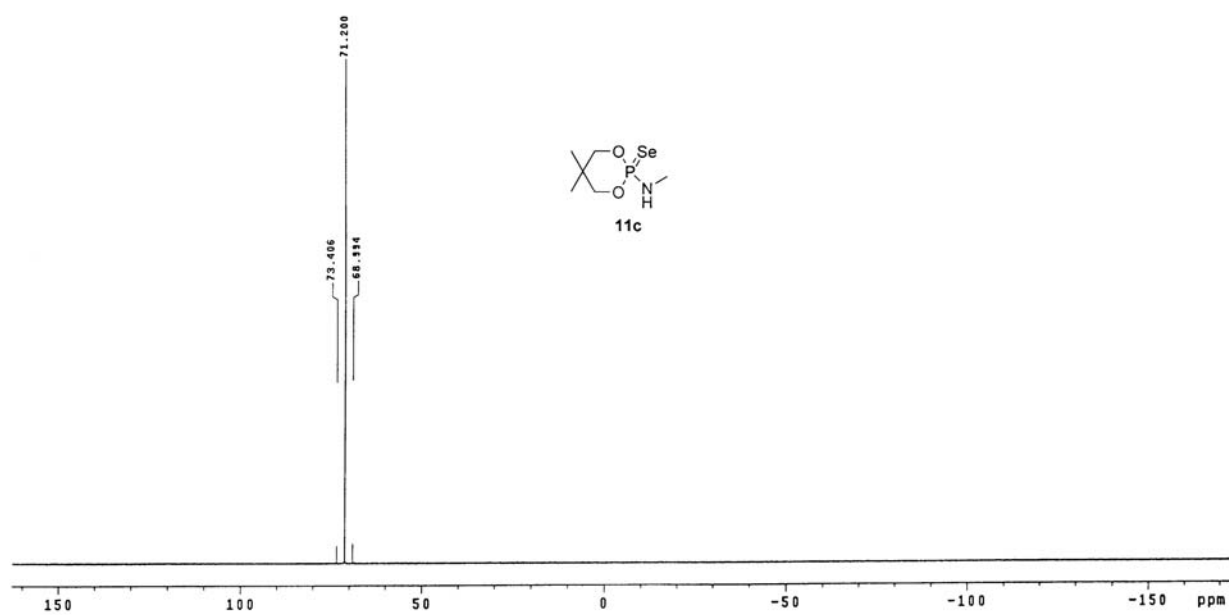

$^1\text{H}$  NMR ( $\text{CDCl}_3$ ):

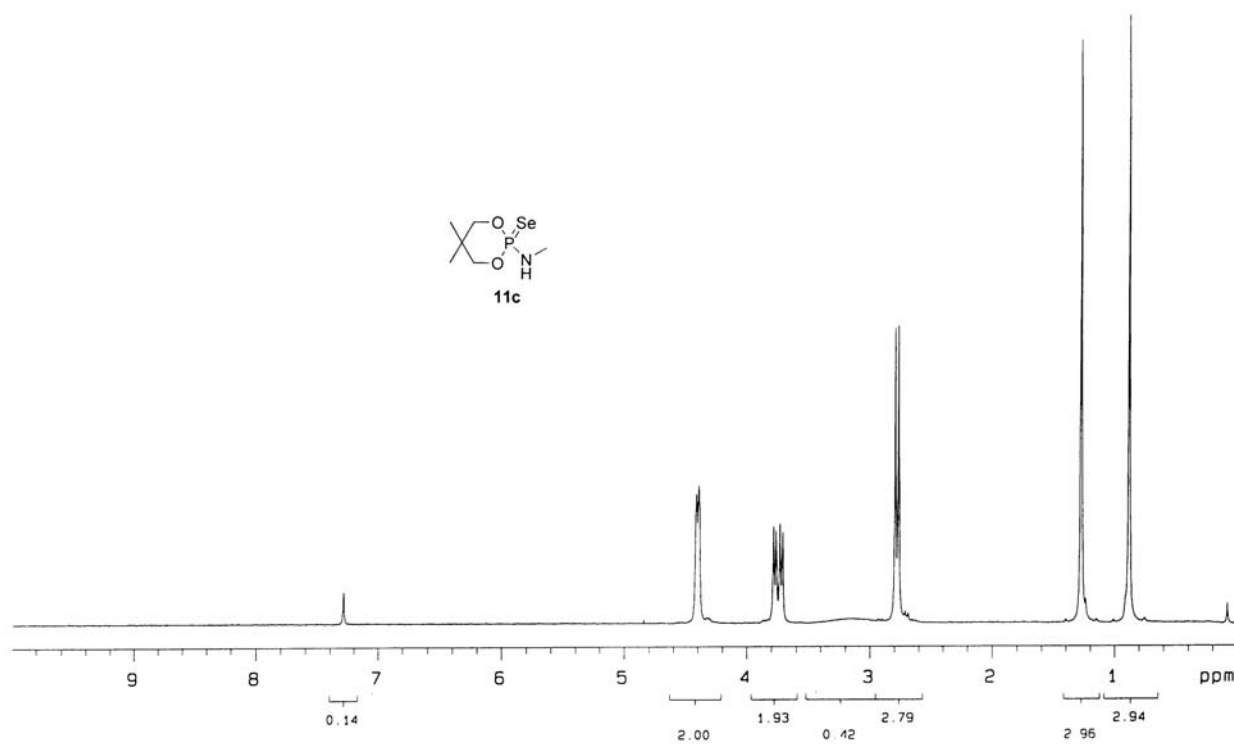



$^1\text{H}$  NMR ( $\text{CDCl}_3$ ):

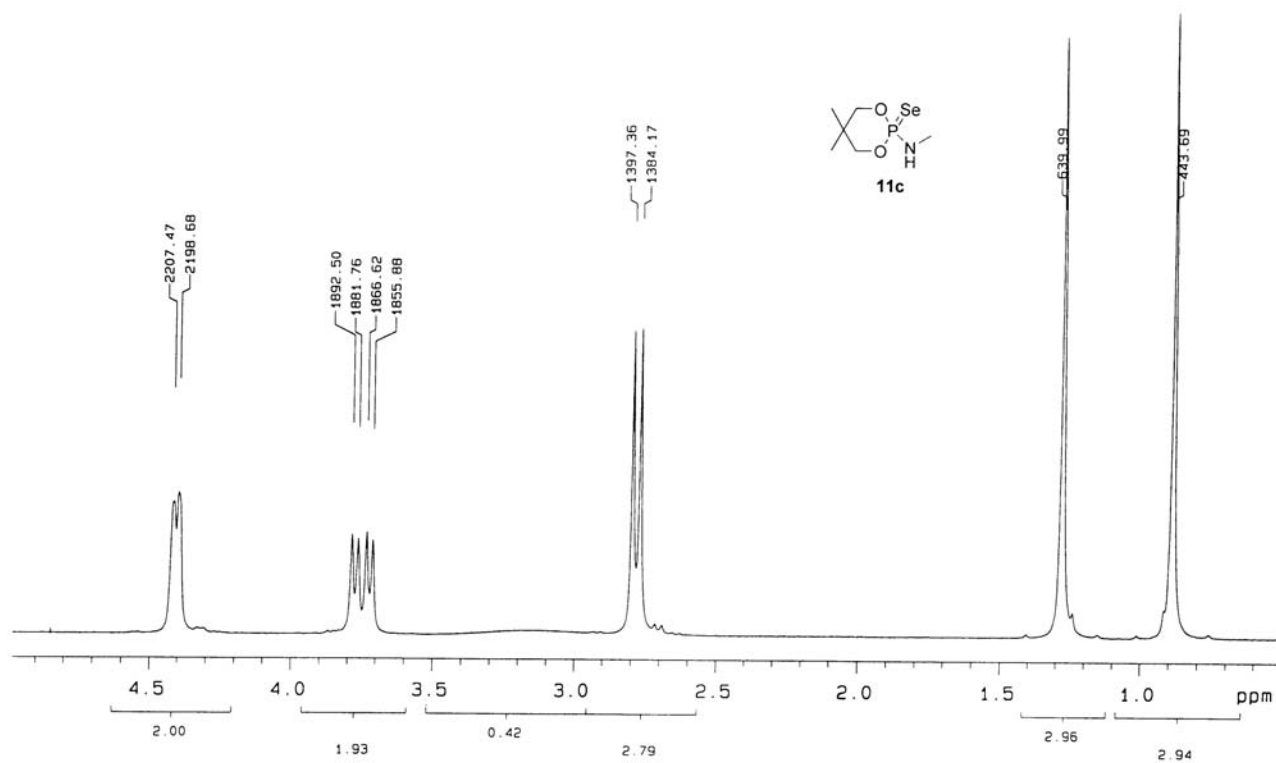

$^{13}\text{C}$  NMR ( $\text{CDCl}_3$ ):

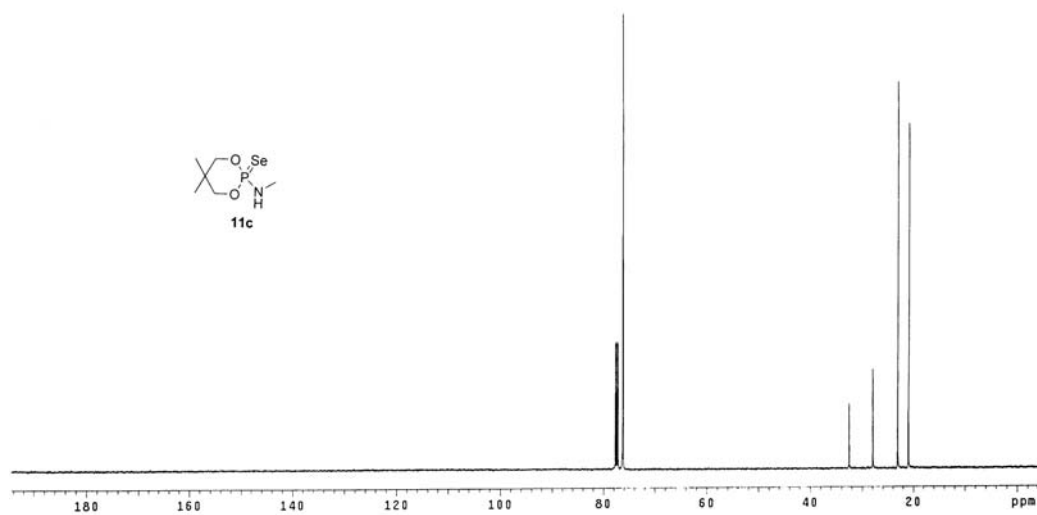

$^{13}\text{C}$  NMR ( $\text{CDCl}_3$ ):

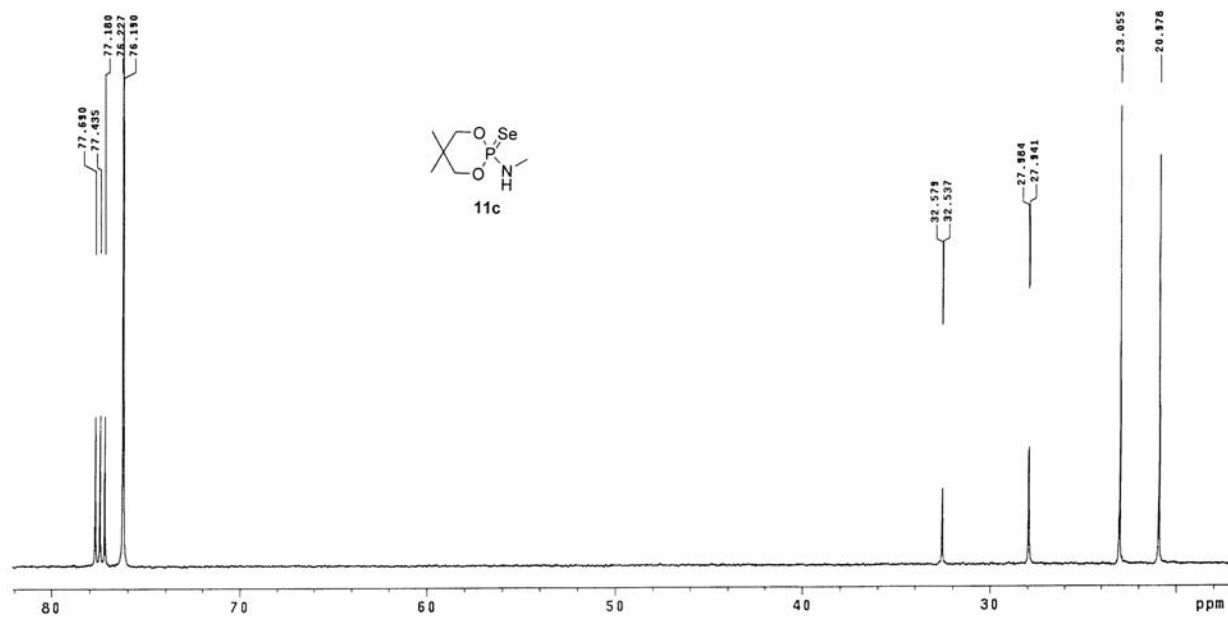

*N*-(*p*-chlorobenzoyl)-2-amino-2-seleno-5,5-dimethyl-1,3,2-dioxaphosphorinane **8a**

$^{31}\text{P}$  NMR ( $\text{CDCl}_3$ ):

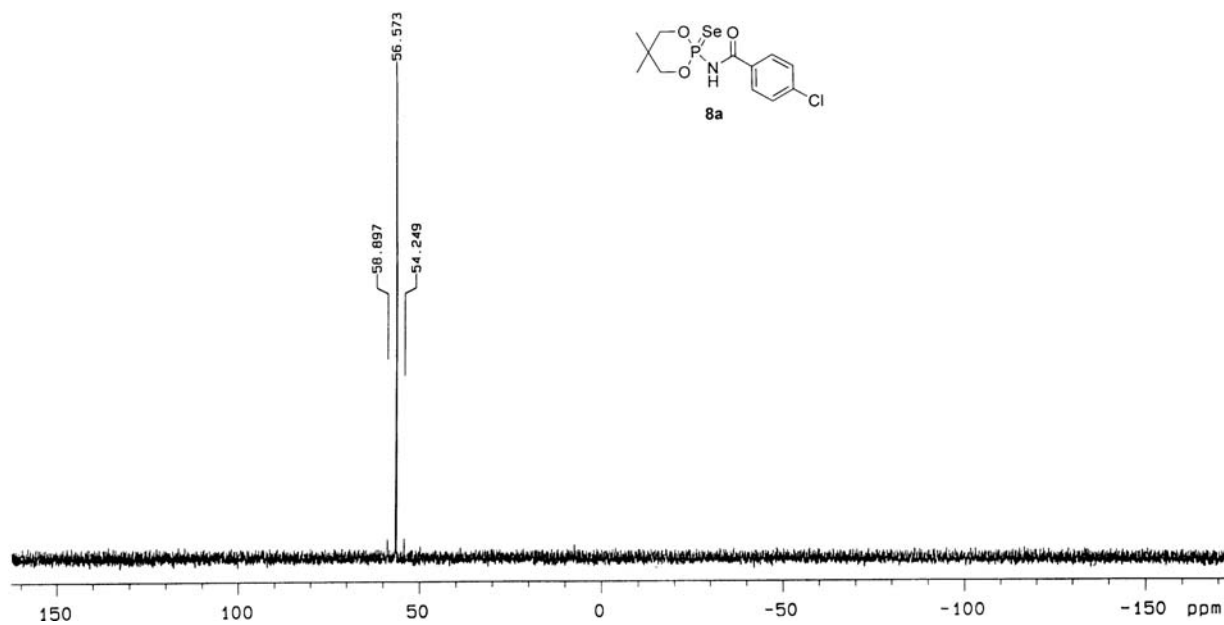

$^1\text{H}$  NMR ( $\text{CDCl}_3$ ):

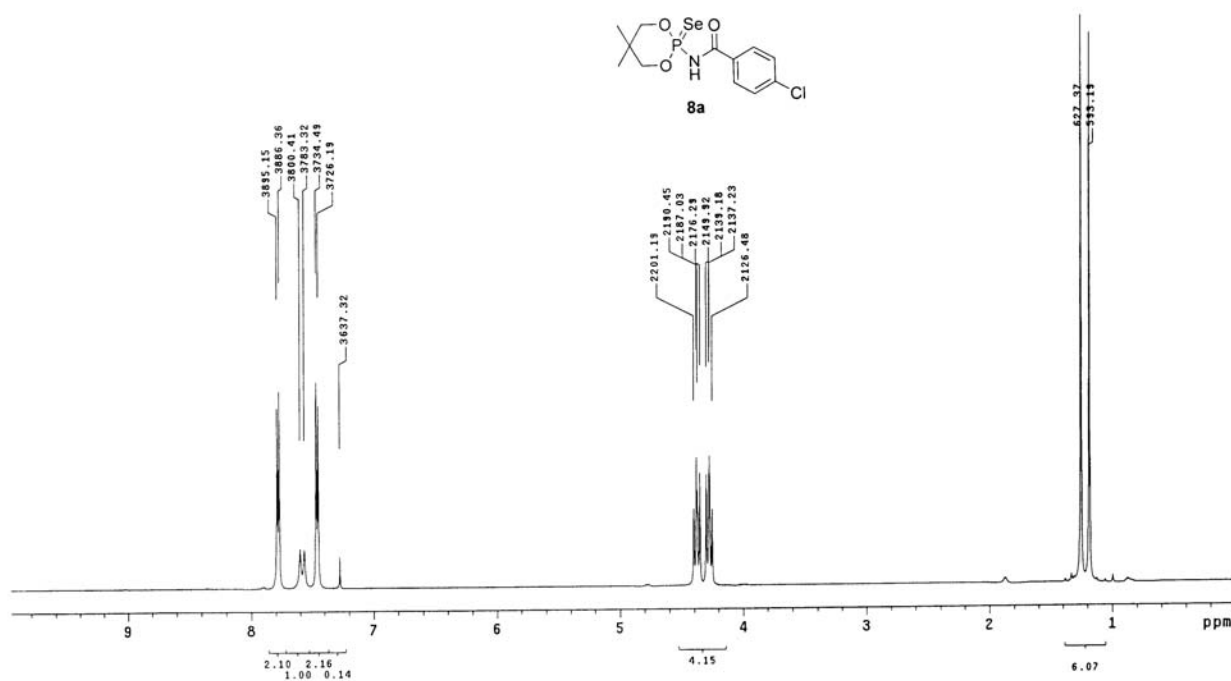

$^{13}\text{C}$  NMR ( $\text{CDCl}_3$ ):

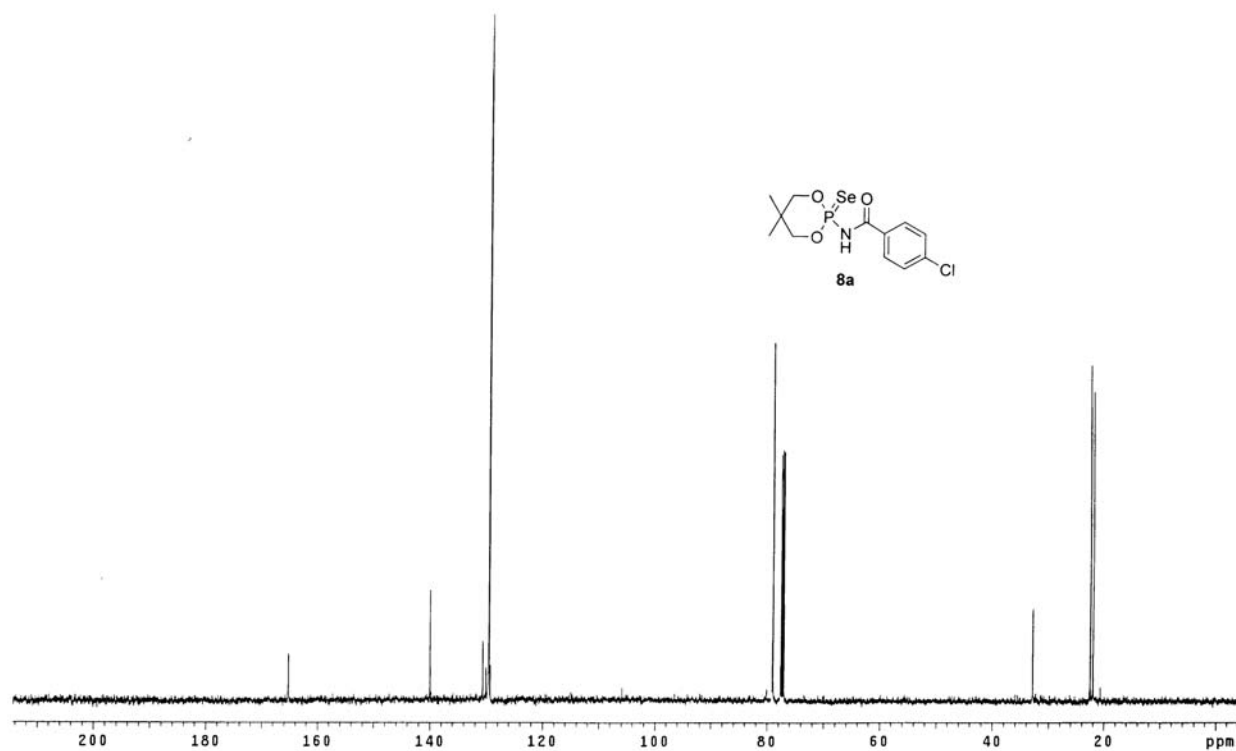

$^{13}\text{C}$  NMR ( $\text{CDCl}_3$ ):

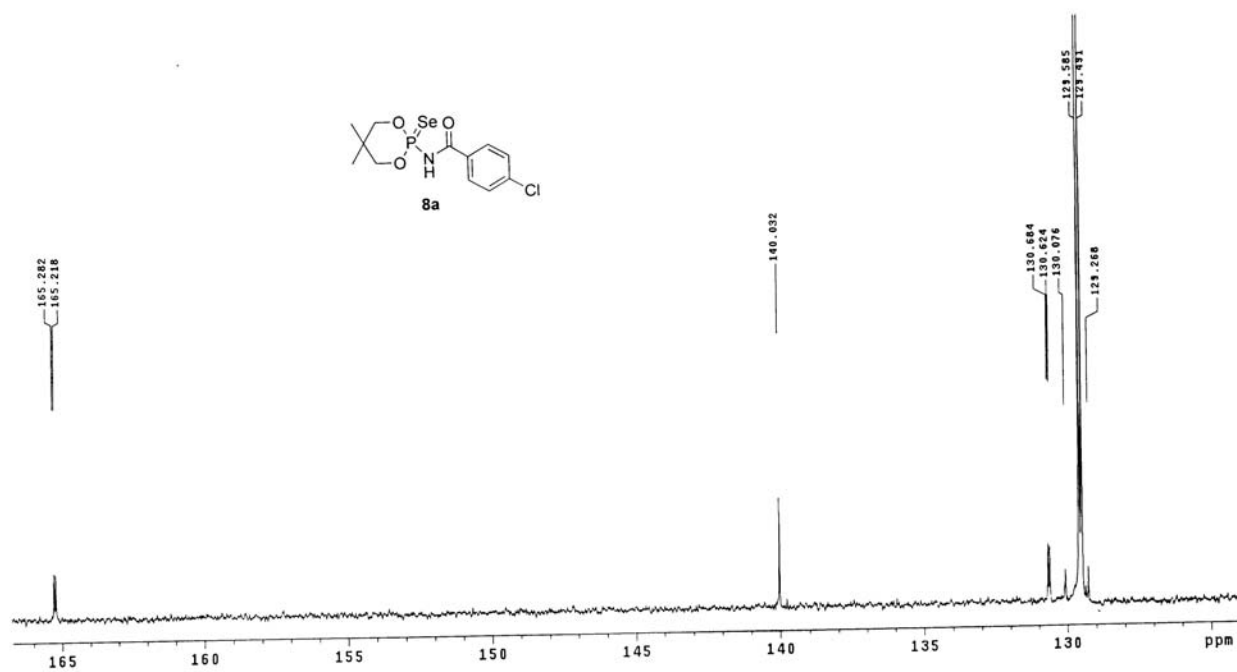

$^{13}\text{C}$  NMR ( $\text{CDCl}_3$ ):

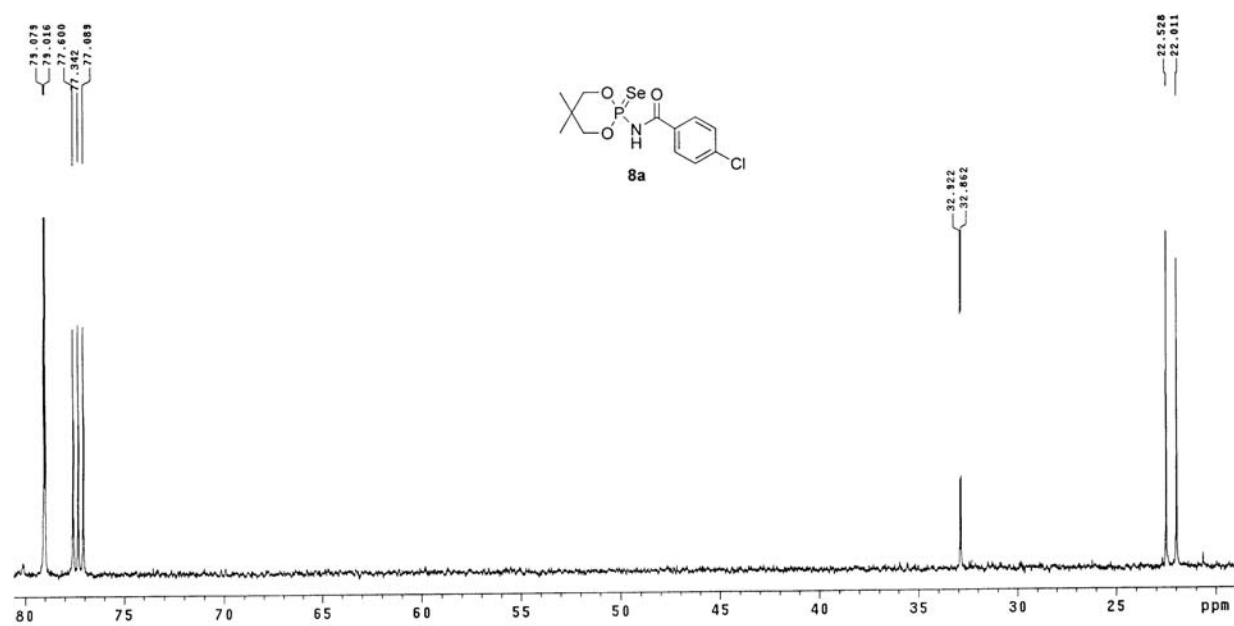

*N*-pivaloyl-2-amino-2-seleno-5,5-dimethyl-1,3,2-dioxaphosphorinane **8b**

$^{31}\text{P}$  NMR ( $\text{CDCl}_3$ ):

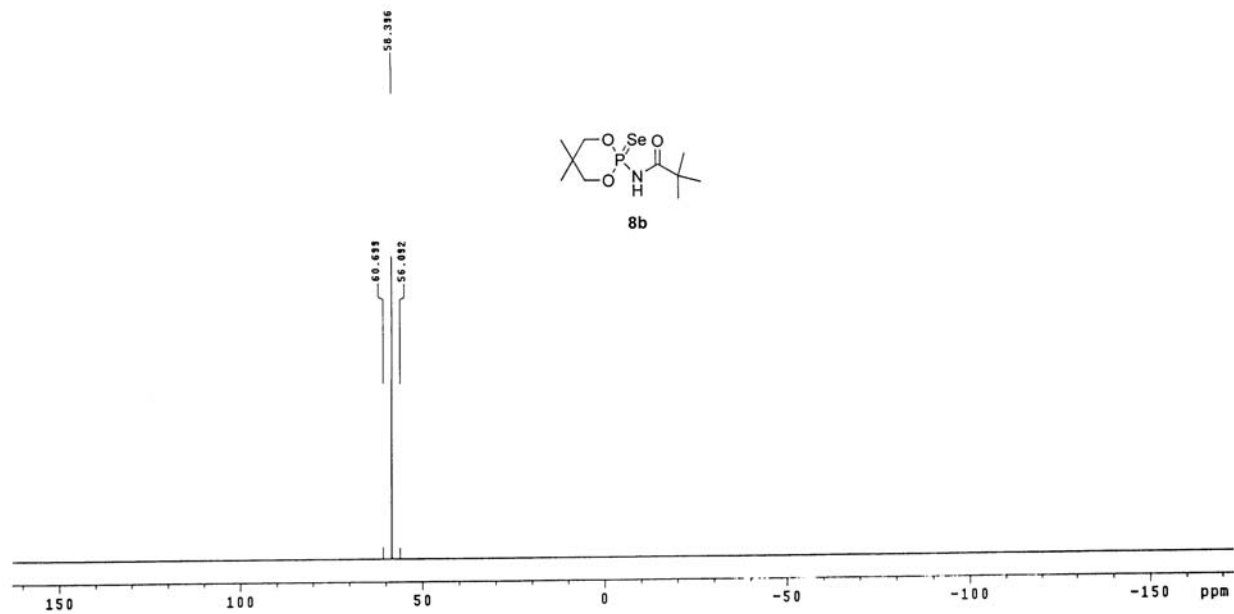

$^1\text{H}$  NMR ( $\text{CDCl}_3$ ):

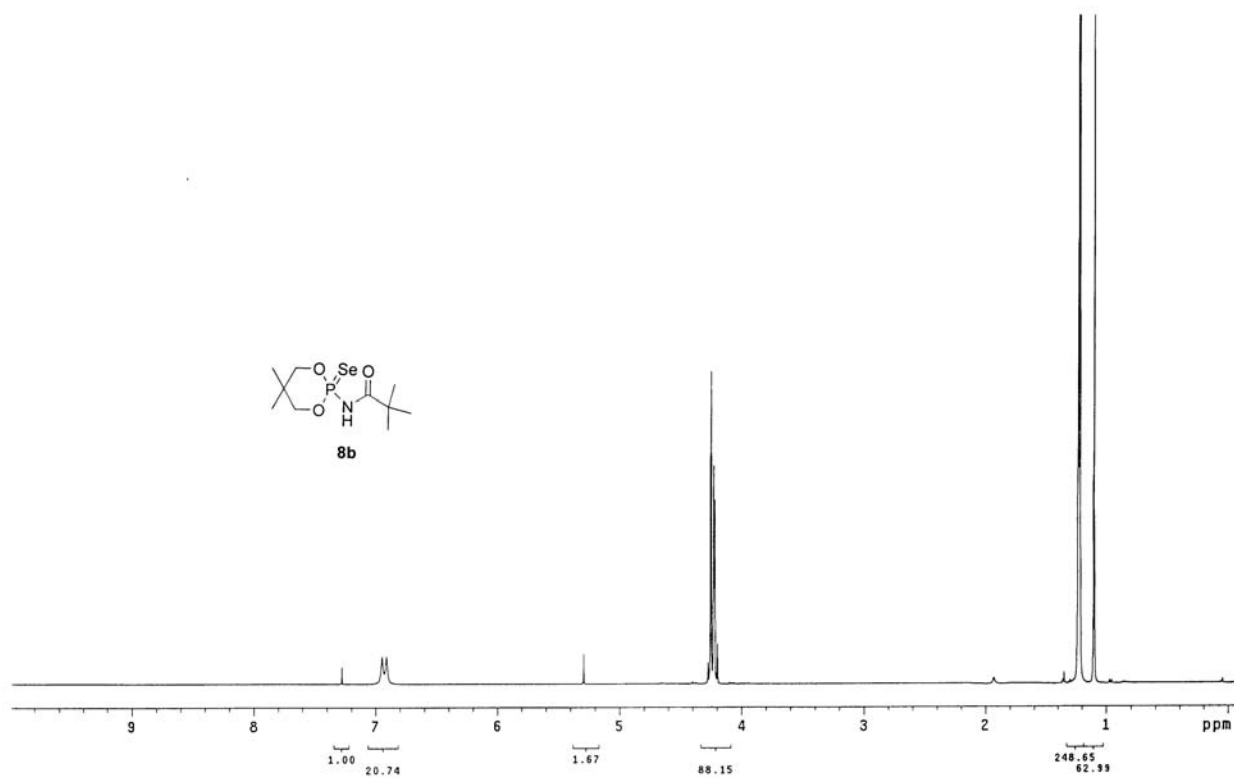

$^1\text{H}$  NMR ( $\text{CDCl}_3$ ):

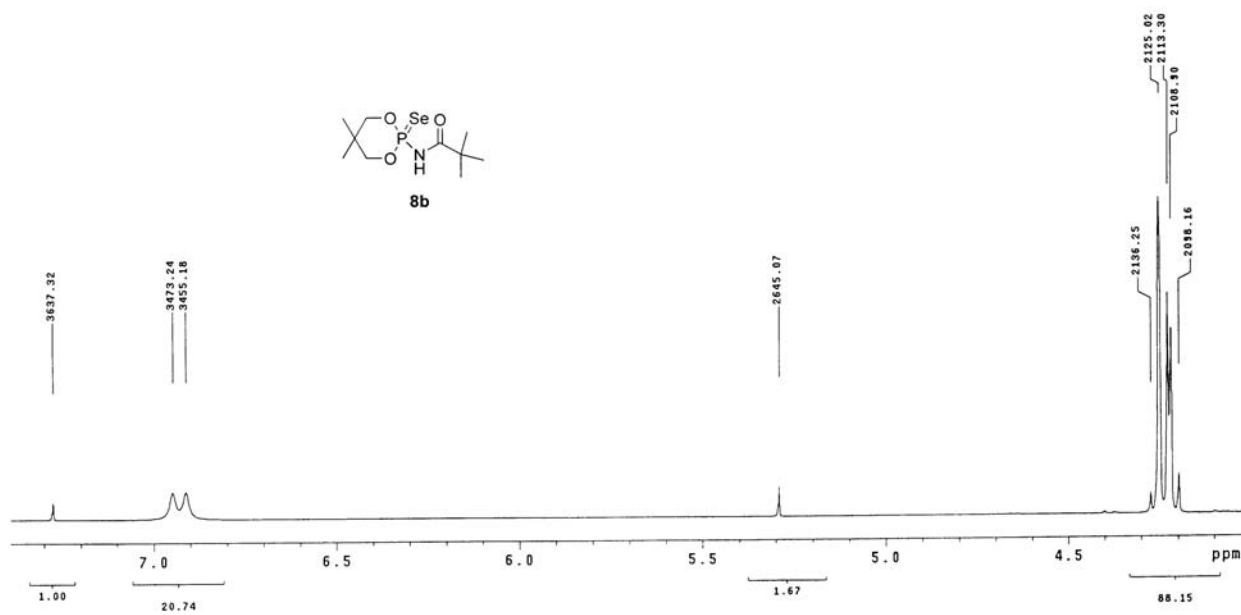

$^1\text{H}$  NMR ( $\text{CDCl}_3$ ):

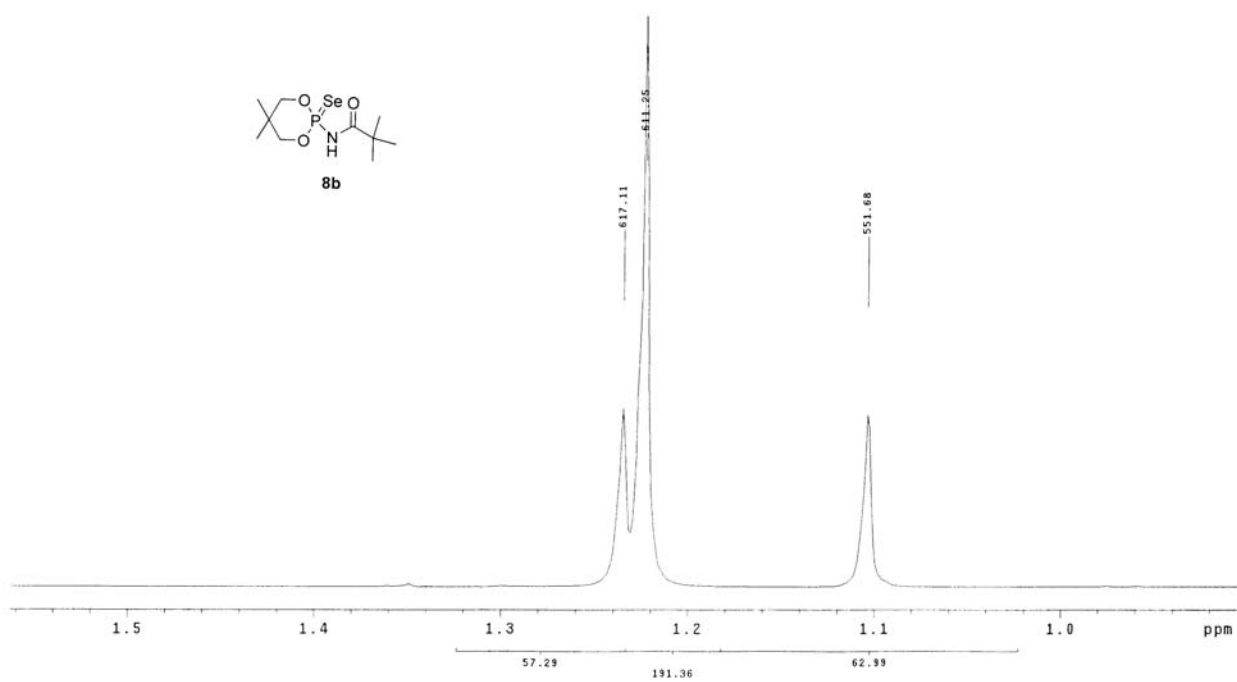

$^{13}\text{C}$  NMR ( $\text{CDCl}_3$ ):

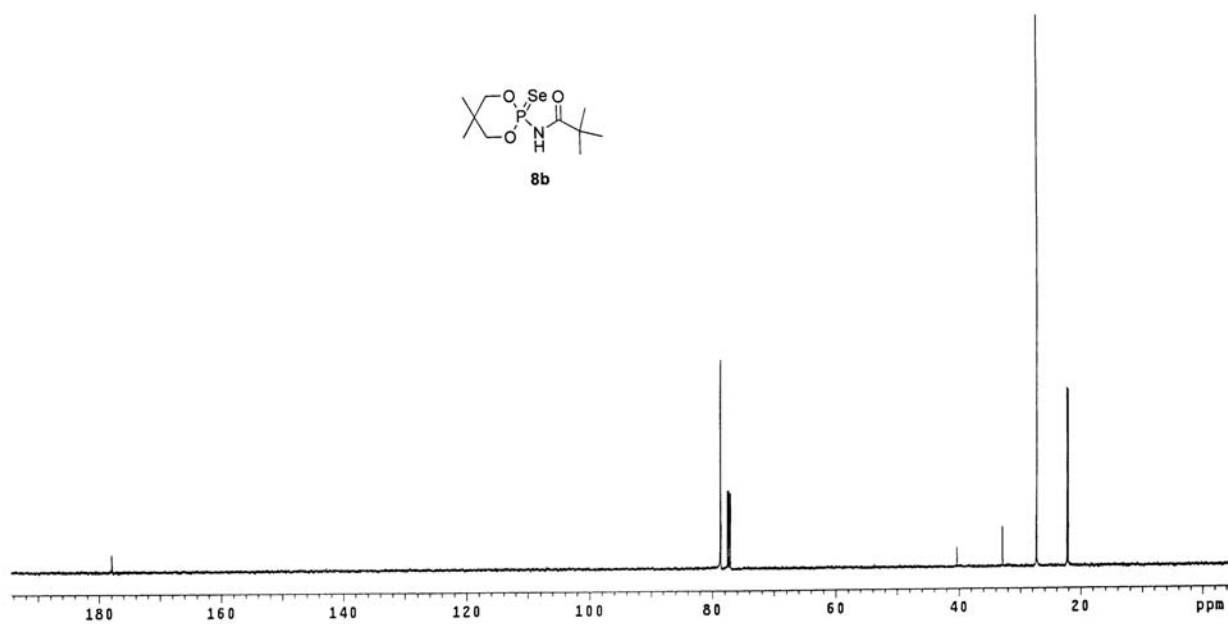

$^{13}\text{C}$  NMR ( $\text{CDCl}_3$ ):

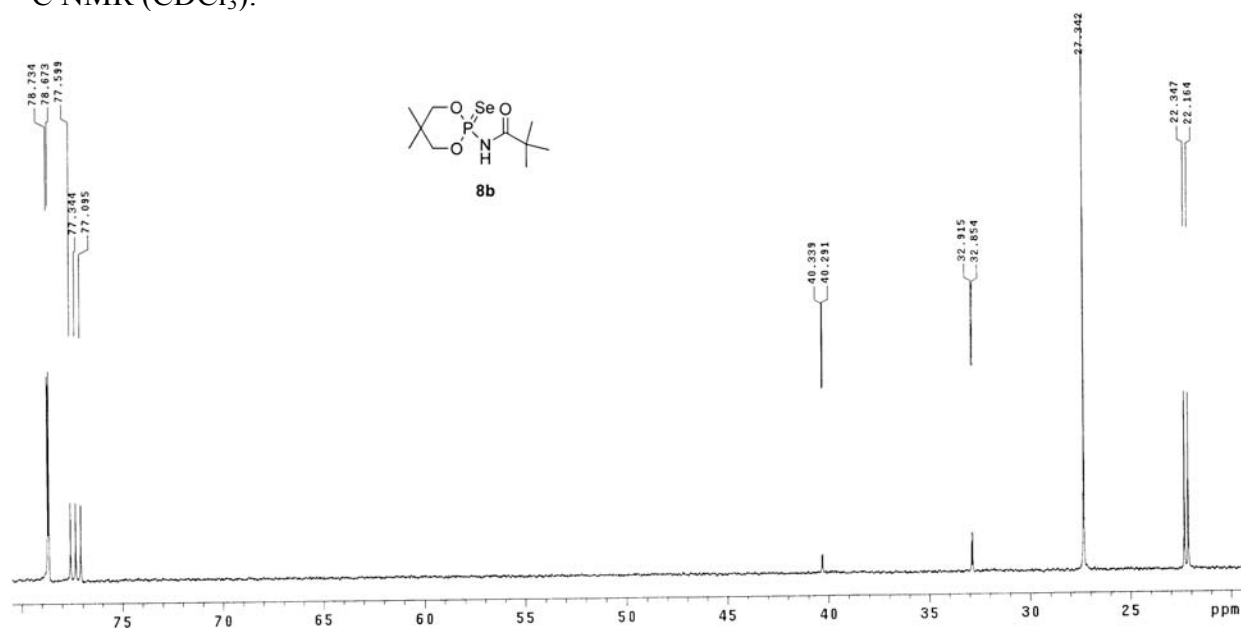

Supplement: b907641g.pdf [file b907641g.pdf]
